# Supplementary material
Source: Springer Nature journal article supplement (https://www.springermedizin.de/resource/supplementary/12911_2007_154_MOESM8_ESM.pdf/9527250)

Sort by

Cost Performance Size

|     | P    | N      |
|-----|------|--------|
| "P" | 1165 | 0      |
| "N" | 135  | 998700 |

View

1

EESN = 0.896  
EESP = 1.000  
EEACE = 0.000135  
EOCPP = \$100.12  
SIZE = 3

Reject

|     | P    | N      |
|-----|------|--------|
| "P" | 1170 | 0      |
| "N" | 130  | 998700 |

View

2

EESN = 0.900  
EESP = 1.000  
EEACE = 0.000130  
EOCPP = \$100.12  
SIZE = 10

Reject

|     | P    | N      |
|-----|------|--------|
| "P" | 1168 | 0      |
| "N" | 132  | 998700 |

View

3

EESN = 0.898  
EESP = 1.000  
EEACE = 0.000132  
EOCPP = \$100.12  
SIZE = 8

Reject

|     | P    | N      |
|-----|------|--------|
| "P" | 1170 | 0      |
| "N" | 130  | 998700 |

View

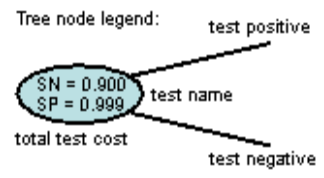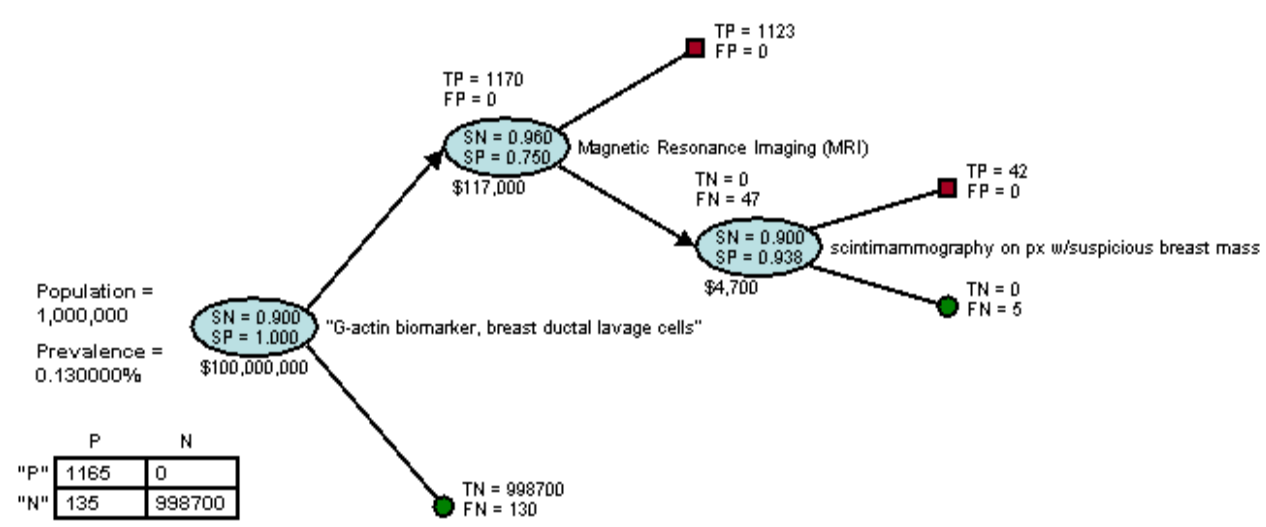

Supplement: MOESM8 [file 9527250]
